# Supplementary material for: Dye-sensitized solar cells containing plasma jet deposited hierarchically nanostructured TiO2 thin photoanodes
Source: Royal Society of Chemistry journal article supplement (doi:10.1039/c3ta11485f), 2013-01-01
Supplement: c3ta11485f.pdf [file c3ta11485f.pdf]

## Dye-sensitized solar cells containing plasma jet deposited hierarchical nanostructured TiO<sub>2</sub> thin photoanodes

by Vanira Trifiletti, Riccardo Ruffo, Christian Turrini, Dario Tasseti, Rosaria Brescia, Fabio di Fonzo, Claudia Riccardi, Alessandro Abboto

### Electronic Supplementary Information (ESI)

**Table S1.** Fitted parameters of the Nyquist plots using the equivalent circuit model.

| TiO <sub>2</sub> film  | R <sub>S</sub><br>[Ωcm <sup>2</sup> ] | R <sub>CE</sub><br>[Ωcm <sup>2</sup> ] | Y <sub>CE</sub><br>[Scm <sup>-2</sup> s <sup>n</sup> ] | n <sub>CE</sub> | R <sub>rec</sub><br>[Ωcm <sup>2</sup> ] | Y <sub>rec</sub><br>[Scm <sup>-2</sup> s <sup>n</sup> ] | n <sub>rec</sub> | W<br>[Scm <sup>-2</sup> s <sup>-0.5</sup> ] | χ <sup>2</sup>       |
|------------------------|---------------------------------------|----------------------------------------|--------------------------------------------------------|-----------------|-----------------------------------------|---------------------------------------------------------|------------------|---------------------------------------------|----------------------|
| 1.2-μm PA-SJD          | 5.1                                   | 2.8                                    | 1.7x10 <sup>-3</sup>                                   | 0.62            | 38                                      | 5.1x10 <sup>-4</sup>                                    | 0.96             | 0.84                                        | 2.8x10 <sup>-5</sup> |
| 1.6-μm PA-SJD          | 2.8                                   | 1.9                                    | 5.2x10 <sup>-3</sup>                                   | 0.59            | 33                                      | 8.2x10 <sup>-4</sup>                                    | 0.96             | 1.8                                         | 6.6x10 <sup>-5</sup> |
| 2.2-μm PA-SJD          | 4.8                                   | 1.3                                    | 4.3x10 <sup>-5</sup>                                   | 0.89            | 27                                      | 9.5x10 <sup>-4</sup>                                    | 0.97             | 0.29                                        | 4.7x10 <sup>-5</sup> |
| conventional monolayer | 2.9                                   | 4.0                                    | 1.5x10 <sup>-3</sup>                                   | 0.62            | 15                                      | 1.4x10 <sup>-3</sup>                                    | 0.95             | 0.70                                        | 9.1x10 <sup>-5</sup> |
